# Supplementary material
Source: publisher site journal article supplement (https://www.dovepress.com/article/supplementary_file/596731/596731%20Revised%20Supplementary%20material.docx)
Supplement: Supplementary file 1 [file 596731%20Revised%20Supplementary%20material.docx]

**Supplementary data**

**Supplementary Table S1** Number of patients who discontinued prior hypnotics after switching to LEM during the study

|  | **Switch to LEM**  **(N=33)** |
| --- | --- |
| The first day of LEM treatment |  |
| Discontinued previous hypnotics treatment, n (%) | 23 (69.7%) |
| After 1 week of LEM treatment |  |
| Discontinued previous hypnotics treatment, n (%) | 24 (72.7%) |
| After 2 weeks of LEM treatment |  |
| Discontinued previous hypnotics treatment, n (%) | 29 (87.9%) |
| After 4 weeks of LEM treatment |  |
| Discontinued previous hypnotics treatment, n (%) | 30 (90.9%) |

**Abbreviations:** LEM, Lemborexant.

**Supplementary Table S2** Remission rates and responder rates after LEM treatment, wherein missing data were imputed using multiple imputation

|  | **FAS** | | **PPS** | |
| --- | --- | --- | --- | --- |
|  | **Remission rate** | **Responder rate** | **Remission rate** | **Responder rate** |
| **1 Week** | 16.0% (32/200) | 36.0% (72/200) | 17.8% (24/135) | 41.5% (56/135) |
| **2 Weeks** | 26.8% (54/200) | 55.1% (110/200) | 28.6% (39/135) | 57.6% (78/135) |
| **4 Weeks** | 34.4% (69/200) | 60.0% (120/200) | 37.4% (50/135) | 61.4% (83/135) |

Values were expressed as % (n/n).

**Abbreviations:** FAS, full analysis set; PPS, per protocol set; LEM, Lemborexant.

**Supplementary Table S3** ISI changes from baseline after 1, 2 and 4 weeks of LEM treatment in patients with mild, moderate and severe baseline insomnia

| **ISI change from baseline** | **FAS** | | | **PPS** | | |
| --- | --- | --- | --- | --- | --- | --- |
| **Mild** | **Moderate** | **Severe** | **Mild** | **Moderate** | **Severe** |
| N | 57 | 105 | 38 | 40 | 71 | 24 |
| 1 week | -1.86±4.60 | -4.55±5.26 | -7.0±5.71 | -2.65±3.85 | -4.93±5.53 | -8.21±5.21 |
| *P* value | <0.001 | | | <0.001 | | |
| N | 49 | 93 | 36 | 39 | 70 | 24 |
| 2 weeks | -2.78±4.33 | -6.68±5.25 | -9.22±5.47 | -3.03±4.19 | -6.90±5.47 | -10.63±4.27 |
| *P* value | <0.001 | | | <0.001 | | |
| N | 49 | 93 | 36 | 39 | 70 | 24 |
| 4 week | -3.76±5.04 | -7.46±5.25 | -11.28±5.46 | -4.23±5.06 | -7.74±5.06 | -11.50±5.49 |
| *P* value | <0.001 | | | <0.001 | | |

**Notes**: Values are expressed as mean±standard deviation

An ISI score of 8-14, 15-21 and 22-28 indicated mild, moderate and severe insomnia, respectively.

**Abbreviations:** ISI, Insomnia Severity Index; LEM, Lemborexant; FAS, full analysis set; PPS, per protocol set.

**Supplementary Figure S1** Treatment regimen-based subgroup analyses in the PPS population. **(A)** Remission rates and **(B)** Responder rate in patients receiving initial LEM monotherapy, those who switched to LEM and those receiving LEM add-on. **Abbreviations:** PPS, per protocol; ISI, Insomnia Severity Index; LEM, Lemborexant.

**A**

**B**

**Supplementary Figure S2** Baseline insomnia severity-based subgroup analyses in the PPS population. **(A)** Remission rates, **(B)** Responder rate and **(C)** ISI change from baseline after 1, 2 and 4 weeks of LEM treatment in patients with mild, moderate and severe baseline insomnia. An ISI score of 8-14, 15-21 and 22-28 indicated mild, moderate and severe insomnia, respectively. **Abbreviations:** PPS, per protocol set; ISI, Insomnia Severity Index; LEM, Lemborexant.

**A**

**B**

**C**
